# Supplementary material for: TcMYB8, a R3-MYB Transcription Factor, Positively Regulates Pyrethrin Biosynthesis in Tanacetum cinerariifolium
Source: MDPI journal article supplement (doi:10.3390/ijms232012186), 2022-10-12
Supplement: s1 [file s1]

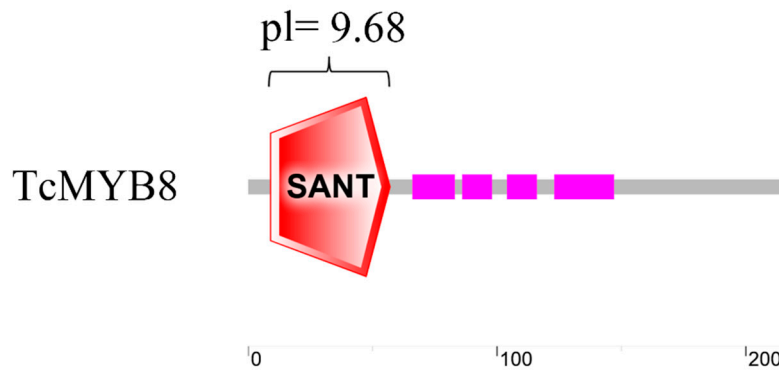

**Figure S1. Conserved domain analysis of TcMYB8 protein.** It contains one conserved MYB domain with a basic pI (9.68).

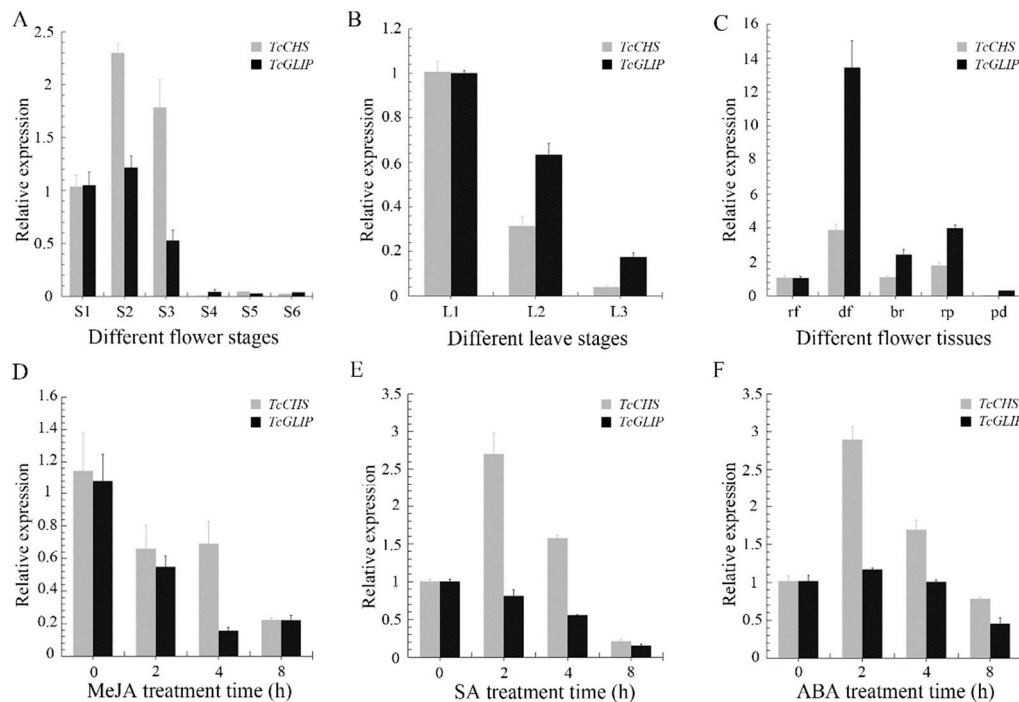

**Figure S2. Expression patterns of *TcCHS* and *TcGLIP*.** (A) qRT-PCR analysis of *TcCHS* and *TcGLIP* expression level in different stages of flowers (S1: bud, S2: half-open of peripheral ray flower, S3: 1st row of disk flower open, S4: half rows of disk flowers open, S5: all rows of disk flowers open, S6: past flowering); (B) qRT-PCR analysis of *TcCHS* and *TcGLIP* expression level in different stages of leaves, L1: small leaves (5-10mm in width), L2: medium leaves (15-20mm in width), L3: large leaves (>25mm in width); (C) qRT-PCR analysis of *TcCHS* and *TcGLIP* expression level in different flowers tissues (S2: ray flower, disk flower, bracts, receptacle and pedicel); (D) qRT PCR analysis of *TcCHS* and *TcGLIP* expression level within 8 hours under MeJA treatment of tissue culture seedlings; (E) qRT PCR analysis of *TcCHS* and *TcGLIP* expression level within 8 hours under SA treatment of tissue culture seedlings; (F) qRT PCR analysis of *TcCHS* and *TcGLIP* expression level within 8 hours under ABA treatment of

tissue culture seedlings.

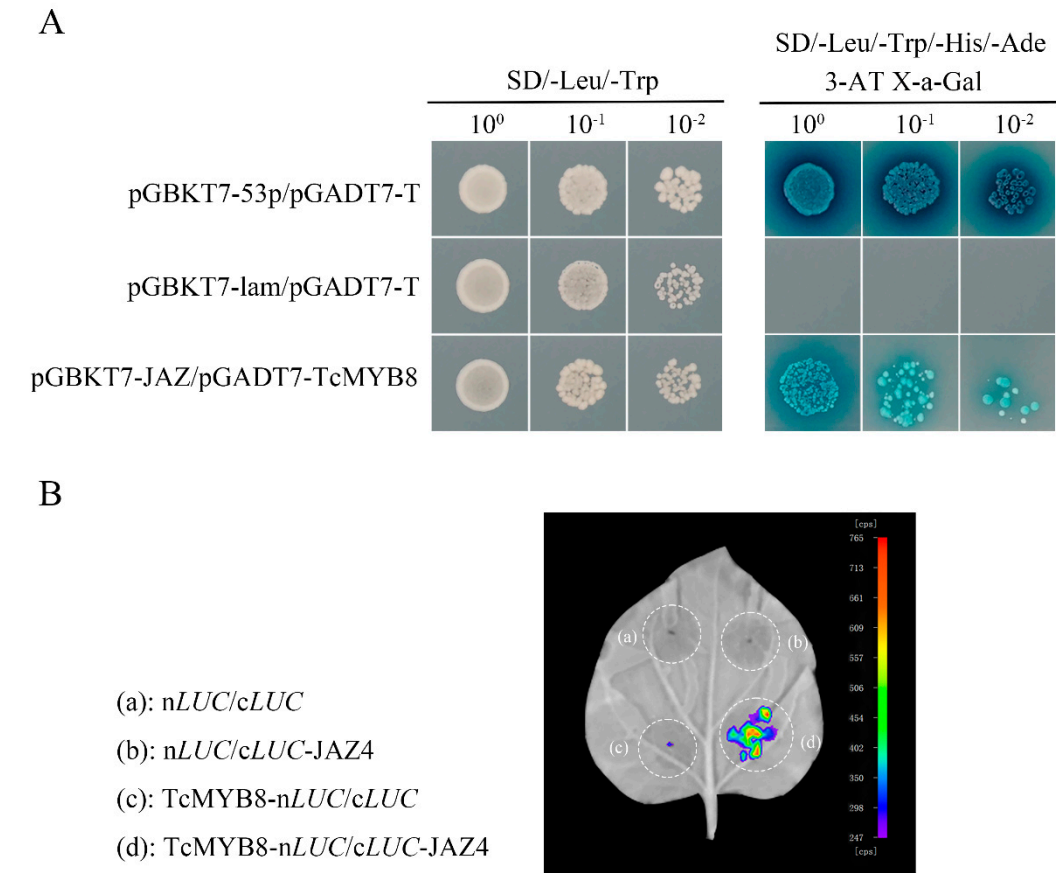

**Figure S3. The interaction between TcMYB8 and tify\_33876 (JAZ4) protein.** (A) Y2H assay showing *TcMYB8* interacting with JAZ4; (B) Luciferase Report showing that TcMYB8 protein could interact with JAZ4. (a): nLUC/cLUC, (b): nLUC/cLUC-JAZs, (c): TcMYB8- nLUC/cLUC, (d): TcMYB8- nLUC/cLUC-JAZ4.

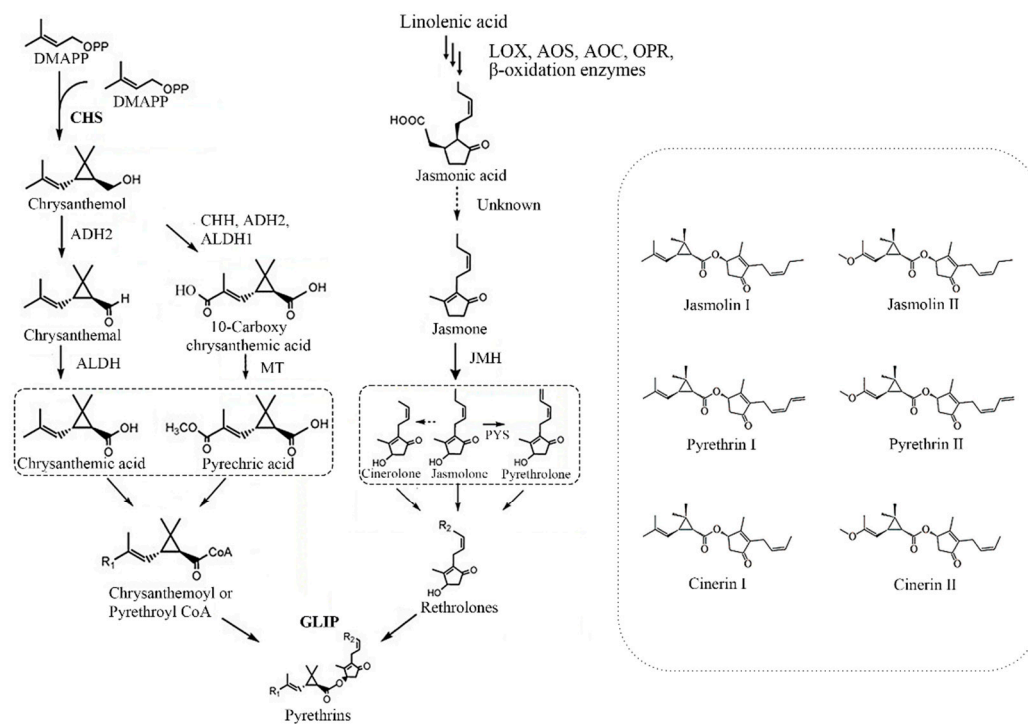

**Figure S4. Pyrethrin metabolic pathway and pyrethrin components.**

**Table S1. Part of cis-acting regulatory elements in promoters of *TcMYB8***

| <b>Class</b>               | <b>Name</b>  | <b>Core Sequence</b> | <b>Num</b> | <b>Predictive Function</b>                                        |
|----------------------------|--------------|----------------------|------------|-------------------------------------------------------------------|
| Transcriptional regulation | TATA-box     | TATA                 | 6          | Core promoter element around -30 of transcription start           |
|                            | CAAT-box     | CAAT/CAAAT           | 15         | Common cis-acting element in promoter and enhancer regions        |
|                            | GCCCORE      | GCCGCC               | 1          | Cis-acting regulatory element involved in the MeJA-responsiveness |
|                            | T/GBOXATPIN2 | AACGTG               | 3          |                                                                   |
|                            | ABRE3a       | TACGTG               | 1          |                                                                   |
|                            | ABRE4        | CACGTA               | 1          |                                                                   |
|                            | ABRE         | ACGTG                | 2          | Cis-acting element involved in the abscisic acid responsiveness   |
|                            | MYB2         | TAACTG               | 1          |                                                                   |
| Hormone response           | MYCATRD22    | CACATG               | 1          | Cis-acting element involved in gibberellin-responsiveness         |
|                            | MYC          | CATGTG               | 1          |                                                                   |
|                            | P-box        | CCTTTTG              | 1          |                                                                   |
|                            | TCA-element  | CCATCTTTT            | 1          |                                                                   |
|                            | TCA-element  | TCATCTTCAT           | 1          | Cis-acting element involved in salicylic acid responsiveness      |
|                            | WBOXATNPR1   | TTGAC                | 4          | Cis-acting element involved in ETH responsiveness                 |
|                            | ELRE         | TTGACC               | 1          |                                                                   |
|                            | TATCCAOSAMY  | TATCCA               | 2          |                                                                   |
| Stress response            | W-box        | TTGACC               | 2          | Trauma response                                                   |
|                            | E-box        | CATGTG               | 1          | Participating in phenylalanine metabolism elements                |
|                            | MRE          | AACCTAA              | 1          | MYB binding site involved in light responsiveness                 |
|                            | GATA-motif   | GATAGGA              | 1          | Part of a light responsive element                                |
| Light response             | TCT-motif    | TCTTAC               | 2          |                                                                   |
|                            | GT1-motif    | GGTTAA               | 1          | Light responsive element                                          |
|                            | G-Box        | CACGTT               | 1          | Cis-acting regulatory element involved in light responsiveness    |
|                            | G-box        | TACGTG               | 1          |                                                                   |

**Table S2. Primers used in experiments.**

| <b>ID</b>                          | <b>Primer Name</b> | <b>Primer Sequences (5' to 3')</b>                  |
|------------------------------------|--------------------|-----------------------------------------------------|
| Cloning                            | TcMYB8_ORF_F       | ATGAACTATCTTCGGCCCCGG                               |
| Cloning                            | TcMYB8_ORF_R       | TCATACATTTTGATCTTCGCCG                              |
| Realtime PCR                       | TcCHS_RT_F         | ACGTGCATCTTCTGGACCTCTTC                             |
| Realtime PCR                       | TcCHS_RT_R         | TGAACAATCCGACGGTTAAGAGTC                            |
| Realtime PCR                       | TcGLIP_RT_F        | GCCGGGAATGCGAGCAAAACAAC                             |
| Realtime PCR                       | TcGLIP_RT_R        | CGCTCTCGCCTTCCTTAAAACCATA                           |
| Realtime PCR                       | TcGAPDH_RT_F       | AAGGAGGAATCTGAAGGAAAGCTG                            |
| Realtime PCR                       | TcGAPDH_RT_R       | GTTGTTGTTCAAAGCGATTCCAGC                            |
| Realtime PCR                       | GAPDH_RT_F         | AAGGAGGAATCTGAAGGAAAGCTG                            |
| Realtime PCR                       | GAPDH_RT_R         | GTTGTTGTTCAAAGCGATTCCAGC                            |
| Realtime PCR                       | TcMYB8_RT_F        | TGCCAAGTCAACTAAAGTCAAACC                            |
| Realtime PCR                       | TcMYB8_RT_R        | CGATTGCGATGAAGACGATGAAG                             |
| linking to pHis2.1 vector          | CHS_Pro_pHis_F     | gactcactatagggcgaaatcGCTATTATAAAATCCCGTGTCTATGC     |
| linking to pHis2.1 vector          | CHS_Pro_pHis_R     | attactagtggatccacgcgtCATTTACAACAGAATCTTAATGTGAGTGT  |
| linking to pHis2.1 vector          | GLIP_Pro_pHis_F    | gactcactatagggcgaaatcAAACTAGAAGCAAAGATCATCGTACTTC   |
| linking to pHis2.1 vector          | GLIP_Pro_pHis_R    | attactagtggatccacgcgtAGCTTATATGTGCTCAGACAAGAGGT     |
| linking to pGADT7 vector           | MYB8_pGADT7_F      | gtaccagattacgctcatatgATGAACTATCTTCGGCCCCGG          |
| linking to pGADT7 vector           | MYB8_pGADT7_R      | acgattcatctgcagctcgagTCATACATTTTGATCTTCGCCG         |
| linking to pSuper1300GFP vector    | MYB8_s1300g_F      | gggccccgggtcgacatttaaatATGAACTATCTTCGGCCCCGG        |
| linking to pSuper1300GFP vector    | MYB8_s1300g_R      | gcccttgctcaccatggtaccTACATTTTGATCTTCGCCGTCTT        |
| linking to pGreenIIISK62 vector    | MYB8_SK62_F        | caggaattcgatatcaagcttATGAACTATCTTCGGCCCCGG          |
| linking to pGreenIIISK62 vector    | MYB8_SK62_R        | gtcgacggtatcgataagcttTCATACATTTTGATCTTCGCCG         |
| linking to pGreenII0800 LUC vector | CHS_LUC_F          | gtcgacggtatcgataagcttGCTATTATAAAATCCCGTGTCTATGC     |
| linking to pGreenII0800 LUC vector | CHS_LUC_R          | caggaattcgatatcaagcttTTACAACAGAATCTTAATGTGAGTGTATGT |
| linking to pGreenII0800 LUC vector | GLIP_LUC_F         | gtcgacggtatcgataagcttAAACTAGAAGCAAAGATCATCGTACTTC   |
| linking to pGreenII0800 LUC vector | GLIP_LUC_R         | caggaattcgatatcaagcttAGCTTATATGTGCTCAGACAAGAGGT     |

|                            |                  |                                                         |
|----------------------------|------------------|---------------------------------------------------------|
| linking to pET6HN-C vector | MYB8_pET6N_F     | gatctctaagcttgcgaattcATGAACTATCTTCGGCCCCGG              |
| linking to pET6HN-C vector | MYB8_pET6N_R     | accaggcgccgccagaattcGCTACATTTTGATCTTCGCCG               |
| Probes used in EMSA        | Probe_proCHS_F   | TTTGAAGGCAAGTGATGTAAAGTGCTAAGTGTTAAGTCAATGATTATAT       |
| Probes used in EMSA        | Probe_proCHS_R   | ATATAATCATTGACTTAACACTTAGCACTTTACATCACTTGCCTTCAAA       |
| Probes used in EMSA        | Probe_proGLIP_F  | CCTGACAGTTGCTATTTAGTGCTGTCTACTTGTTTAGTTGTGGAGCAAATGACT  |
| Probes used in EMSA        | Probe_proGLIP_R  | AGTCATTTGCTCCACAACATAAACAAGTAGACAGCACTAAATAGCAACTGTCAGG |
| Probes used in EMSA        | mProbe_proCHS_F  | TTAAAAAGCAAAAAATGTAAAGTGCTAAGTGTTAAAAAATTATAT           |
| Probes used in EMSA        | mProbe_proCHS_R  | ATATAATTTTTTTTTTAACACTTAGCACTTTACATTTTTTGCTTTTTAA       |
| Probes used in EMSA        | mProbe_proGLIP_F | CCTAAAAAAACTATTTAGTGCTGTCTAAAAATTTAGTTGTGGAGAAAAAACT    |
| Probes used in EMSA        | mProbe_proGLIP_R | AGTTTTTTTCTCCACAACATAAATTTTAGACAGCACTAAATAGTTTTTTTAGG   |
| ptrv1_check_F              | Ptrv1_f3807      | GGCCTTGCGCCGTTCCAGAT                                    |
| ptrv1_check_R              | ptrv1_r4667      | CCCAAAGGAAGGCCGCCAC                                     |
| ptrv2_check_F              | ptrv2_f1604      | TTATTACGGACGAGTGGACTIONAG                               |
| ptrv2_check_R              | ptrv2_r1761      | AACTTCAGACACGGATCTACTT                                  |
| linking to pTRV2 vector    | MYB8_VIGS_F      | agaaggcctccatggggatccCGATAGTTTCGATAGCGTAATGATG          |
| linking to pTRV2 vector    | MYB8_VIGS_R      | cgtgagctcggtaccggatccTTGATCTTCGCCGTCTTCGA               |
| chromosome walkin cloning  | R-SP1            | TAGTTTCGGACTCATCGAGCGGGT                                |
| chromosome walkin cloning  | R-SP2            | GGCCTTTGAGTTCCGTGGCTAT                                  |
| chromosome walkin cloning  | R-SP3            | GGTGAAGCTTCCTCTCTTGATCCC                                |

**Table S3. Genbank accession of the genes used in the assay**

| <b>Name</b>   | <b>GenBank Accession</b> | <b>Species</b>                          |
|---------------|--------------------------|-----------------------------------------|
| HaMYB8        | XP_022022105.1           | <i>Helianthus annuus</i>                |
| LsMYB8        | XP_023745613.1           | <i>Lactuca sativa</i>                   |
| CcMYB8-like   | XP_024994176.1           | <i>Cynara cardunculus</i> var. scolymus |
| EcMYB8-like   | XP_043638944.1           | <i>Erigeron canadensis</i>              |
| HaMYB111      | XP_021969240.1           | <i>Helianthus annuus</i>                |
| GhMYB9A       | CAD87009.1               | <i>Gerbera hybrid cultivar</i>          |
| EcMYB6-like   | XP_043638942.1           | <i>Erigeron canadensis</i>              |
| DzMYB308-like | XP_022757570.1           | <i>Durio zibethinus</i>                 |
| HuMYB308-like | XP_021280377.1           | <i>Herrania umbratica</i>               |
| PaMYB8-like   | XP_034933413.1           | <i>Populus alba</i>                     |
| TcMYB308      | XP_007051504.1           | <i>Theobroma cacao</i>                  |
| PeMYB308-like | XP_011023154.1           | <i>Populus euphratica</i>               |
| PuMYB3        | QLB38141.1               | <i>Populus ussuriensis</i>              |
| PtMYB308      | XP_002320876.1           | <i>Populus trichocarpa</i>              |
| BpMYB7        | QEE59996.1               | <i>Betula platyphylla</i>               |
| TcMYB8        | OP087309                 | <i>Tanacetum cinerariifolium</i>        |
| tify_33876    | ON961786                 | <i>Tanacetum cinerariifolium</i>        |
